# Supplementary material for: Shape control of core–shell MOF@MOF and derived MOF nanocages via ion modulation in a one-pot strategy
Source: Royal Society of Chemistry journal article supplement (doi:10.1039/c8ta06809g), 2018-01-01
Supplement: c8ta06809g1.pdf [file c8ta06809g1.pdf]

**Supporting Information for**  
**Shape control of core–shell MOF@MOF and derivate MOF**  
**nanocage via ion modulation in one-pot strategy**

Shenjie Wu,<sup>ab</sup> Guoxin Zhuang,<sup>ab</sup> Jinxin Wei,<sup>ab</sup> Zanyong Zhuang,<sup>\*ab</sup> and Yan Yu<sup>\*ab</sup>

<sup>a</sup> College of Materials Science and Engineering, Fuzhou University, New Campus, Minhou,  
Fujian Province 350108, China

<sup>b</sup> Key Laboratory of Eco-materials Advanced Technology (Fuzhou University), Fujian  
Province University, Fujian Province 350108, China

\* E-mail: zyzhuang@fzu.edu.cn; yuyan@fzu.edu.cn

This ESI for *J. Mater. Chem. A*, 2018, **6**, 18234-18241, originally published on 6th September 2018, was updated on 11th January 2019, to correct an error in the units in Table S1.

## Supplemental Figures and Discussions

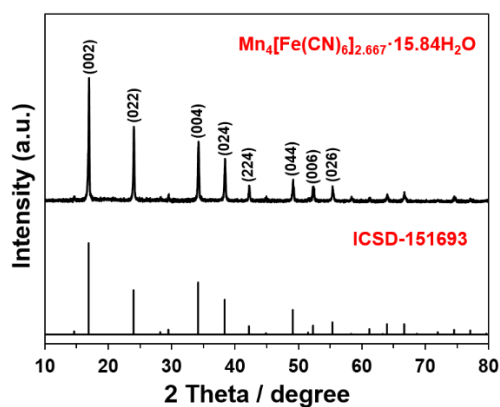

Fig. S1 XRD pattern of the original  $\text{Mn}_4[\text{Fe}(\text{CN})_6]_{2.667}$  (Mn/Fe PBA) nanocubes.

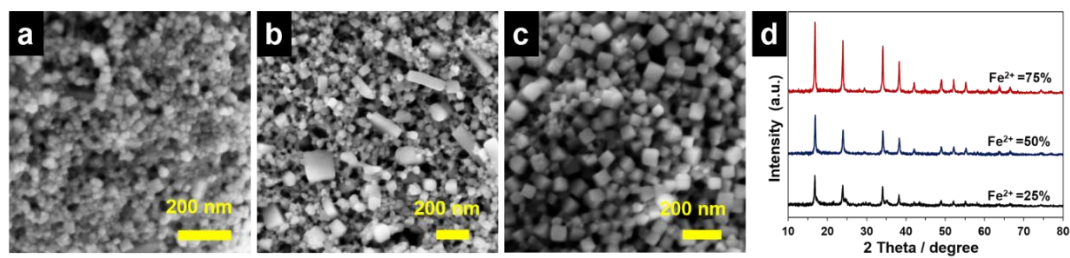

Fig. S2 (a-c) Overview SEM images and (d) XRD patterns of irregular Mn-Fe PBA nanoparticles obtained from the synthetic procedure using different doses of  $\text{Fe}^{2+}$ : (a) 75%, (b) 50%, (c) 25%.

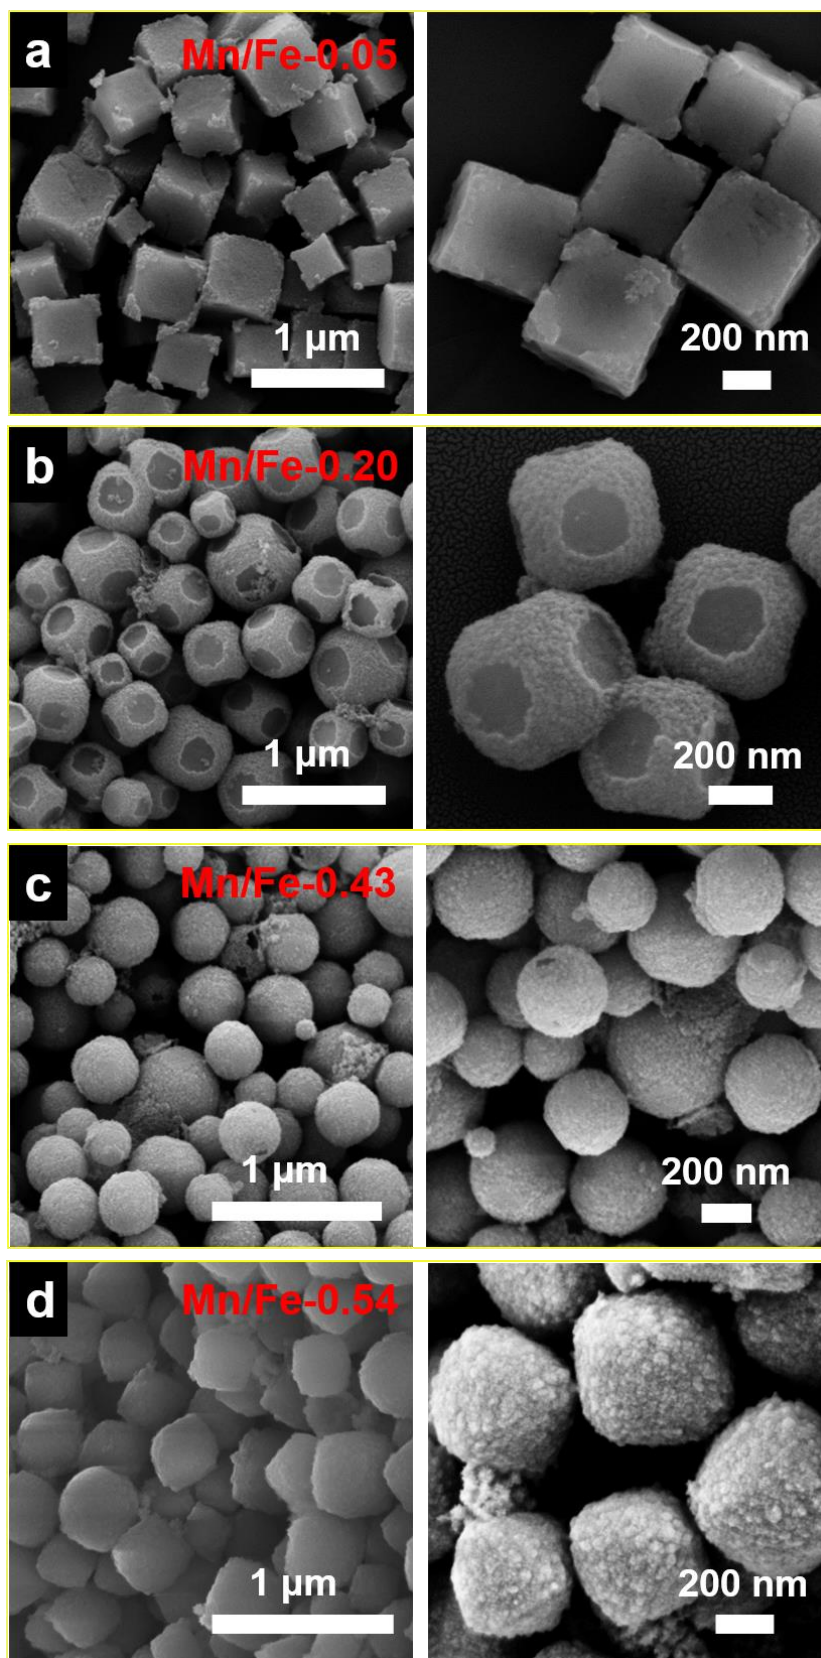

Fig. S3 Large-scale SEM images of (a) Mn/Fe-0.05, (b) Mn/Fe-0.2, (c) Mn/Fe-0.43, and (d) Mn/Fe-0.54.

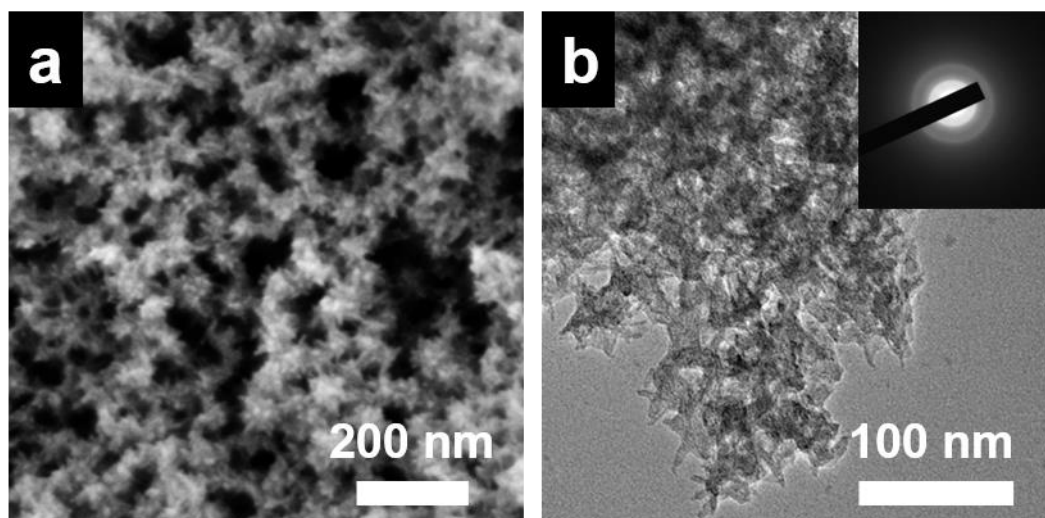

Fig. S4 (a) SEM and (b) TEM images of nanoclusters obtained from the synthetic procedure in the presence of  $>67\%$   $\text{Fe}^{3+}$  (inset: SAED pattern of nanocluster). SAED pattern indicates the amorphous characteristic of obtained nanocluster.

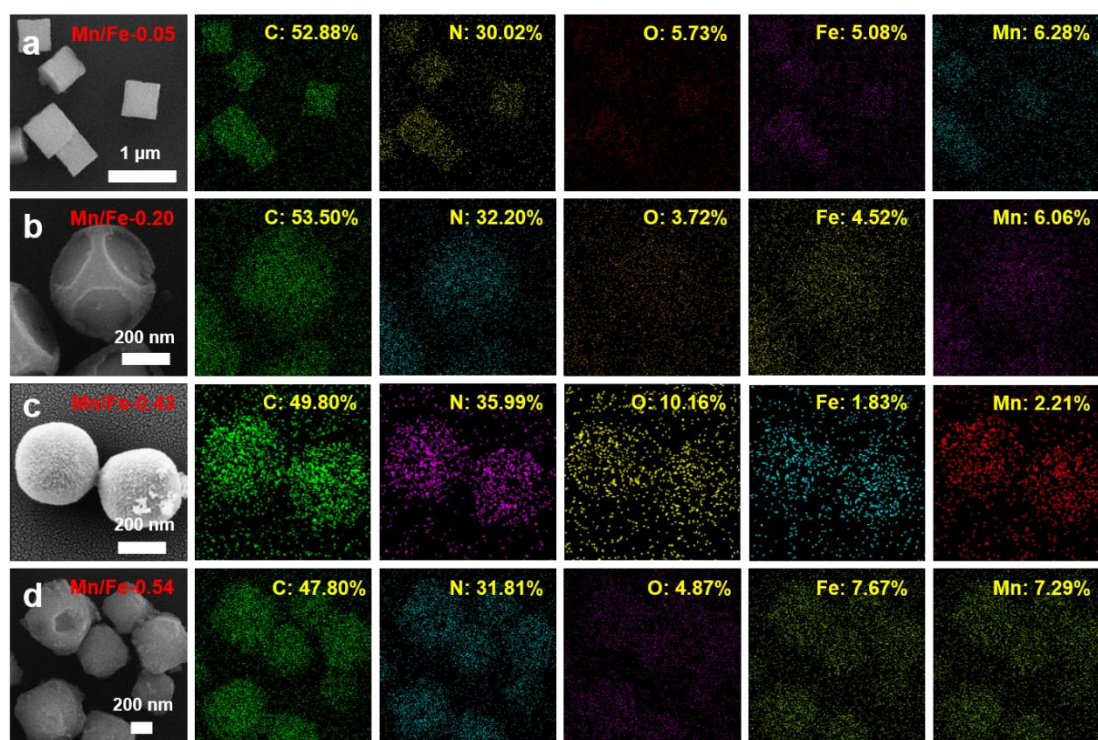

Fig. S5 Elemental mappings (C, N, O, Fe and Mn) of (a) Mn/Fe-0.05, (b) Mn/Fe-0.2, (c) Mn/Fe-0.43, and (d) Mn/Fe-0.54, respectively.



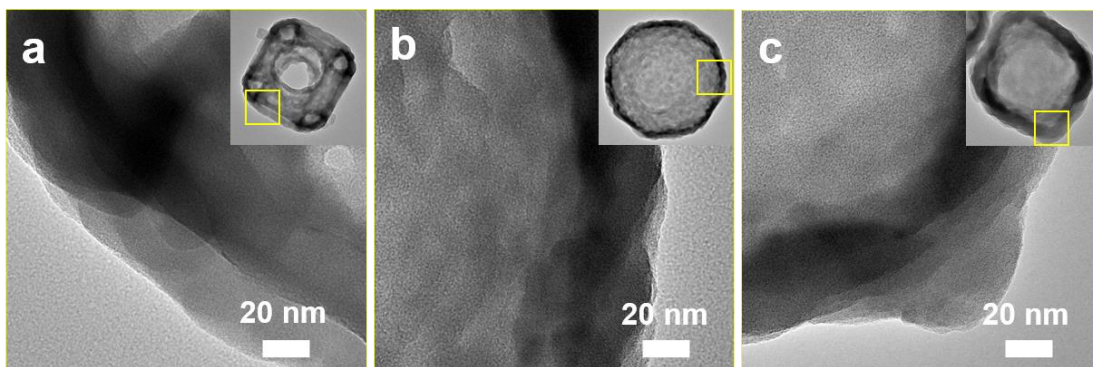

Fig. S6 HRTEM images of (a) Mn/Fe-0.2E, (b) Mn/Fe-0.43E, and (c) Mn/Fe-0.54E, respectively.

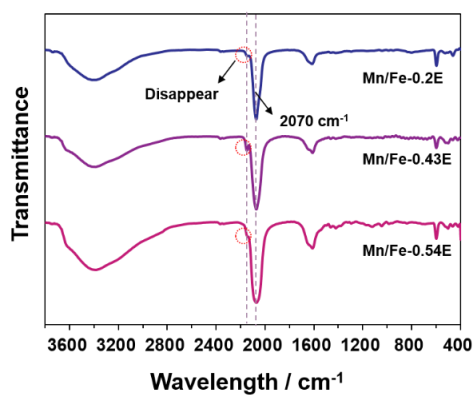

Fig. S7 FT-IR spectra of Mn/Fe-X-E (X=0.2, 0.43, 0.54).

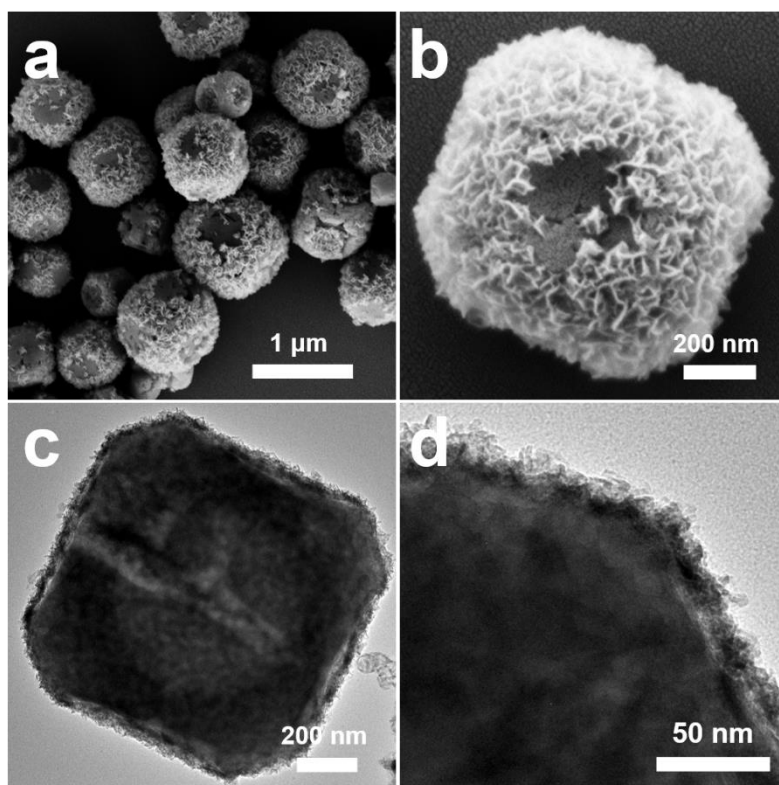

Fig. S8 (a) Low-, (b) high-magnification SEM images, and (c) Low-, (d) high-magnification TEM images of Mn/Fe-0.2 after treated by  $\text{NH}_4\text{F}$ .

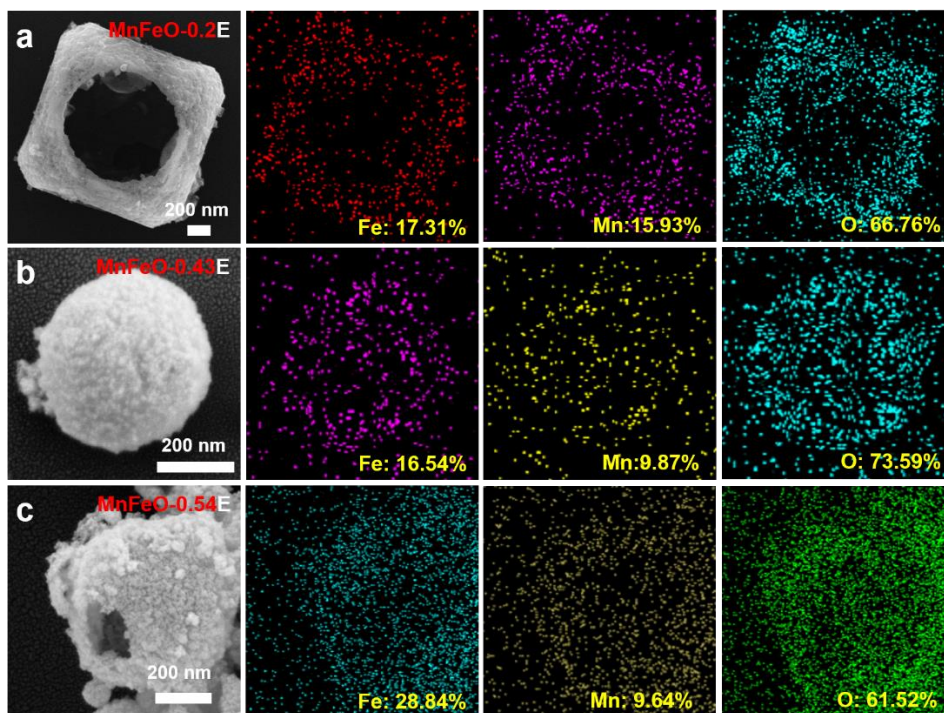

Fig. S9 Elemental mappings of (a) MnFeO-0.2E, (b) MnFeO-0.43E and (c) MnFeO-0.54E, respectively.

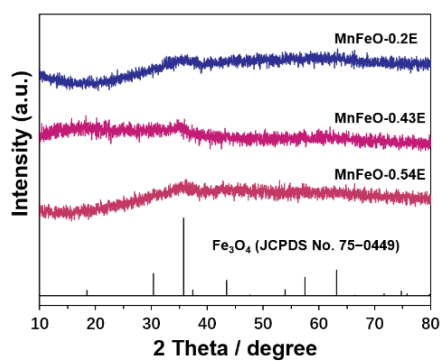

Fig. S10 XRD patterns of MnFeO-X-E (X=0.2, 0.43, 0.54).

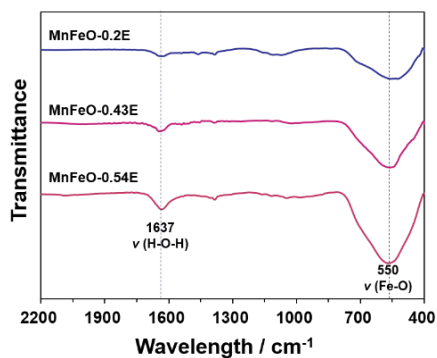

Fig. S11 FT-IR spectra of MnFeO-X-E (X=0.2, 0.43, 0.54).

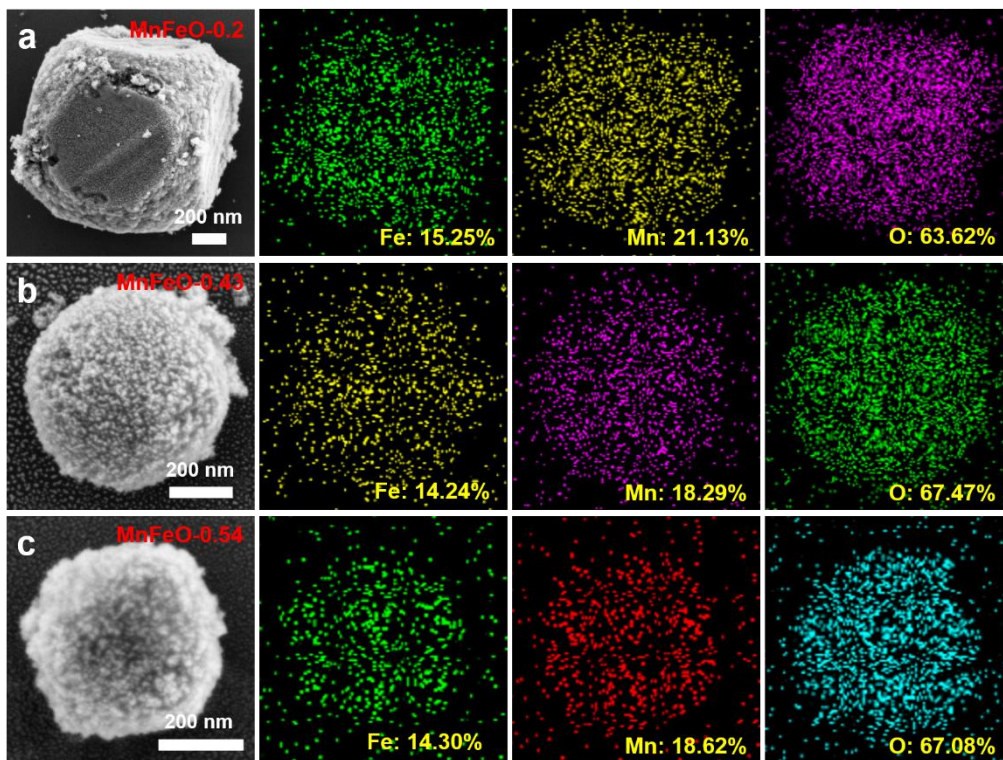

Fig. S12 Elemental mappings of (a) MnFeO-0.2, (b) MnFeO-0.43 and (c) MnFeO-0.54, respectively.

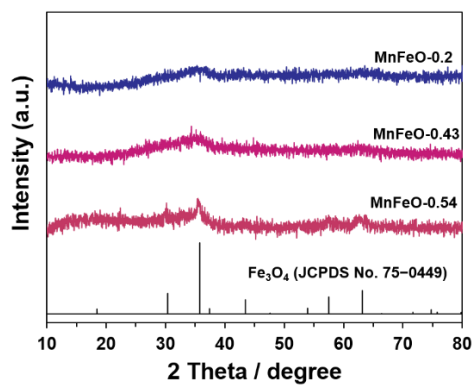

Fig. S13 XRD patterns of MnFeO-X (X=0.2, 0.43, 0.54).

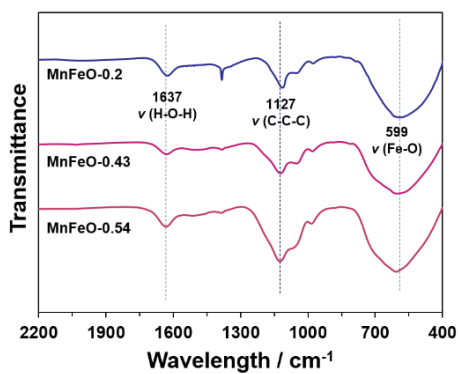

Fig. S14 FT-IR spectra of MnFeO-X (X=0.2, 0.43, 0.54).



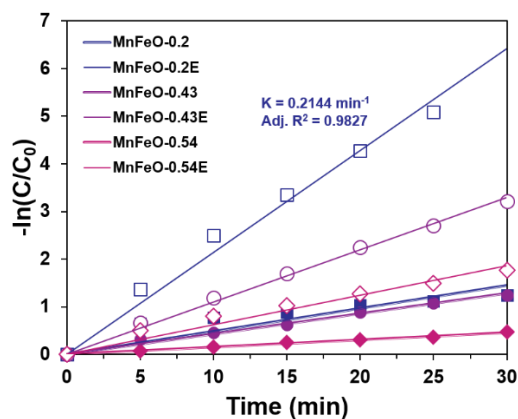

**Fig. S15** Kinetic curves in different reaction systems. Reaction conditions: [BPA] = 10 mg/L, [PMS] = 0.2 g/L, [catalyst] = 0.1 g/L.

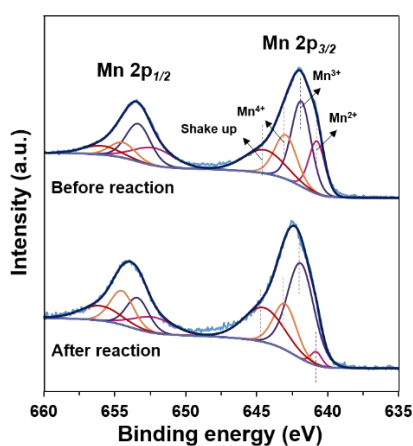

**Fig. S16** Mn 2p regions of the XPS spectra of the MnFeO-0.2E sample before and after the reaction. Reaction conditions: [BPA] = 10 mg/L, [PMS] = 0.2 g/L, [MnFeO-0.2E] = 0.1 g/L.

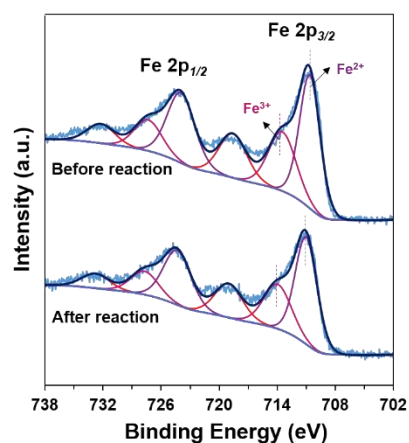

**Fig. S17** Fe 2p regions of the XPS spectra of the MnFeO-0.2E sample before and after the reaction. Reaction conditions: [BPA] = 10 mg/L, [PMS] = 0.2 g/L, [MnFeO-0.2E] = 0.1 g/L.



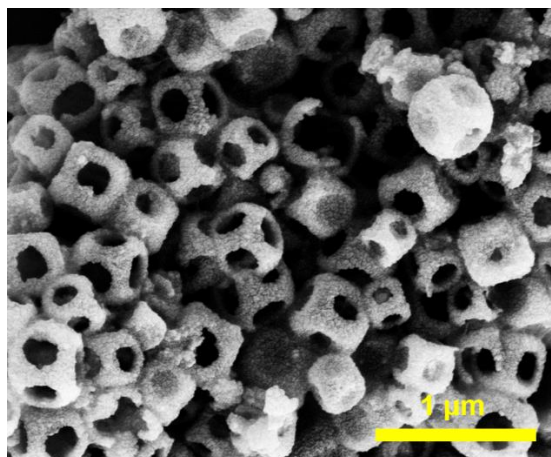

**Fig. S18** SEM image of the MnFeO-0.2E sample after three-cycle reactions. Reaction conditions: [BPA] = 10 mg/L, [PMS] = 0.2 g/L, [MnFeO-0.2E] = 0.1 g/L .

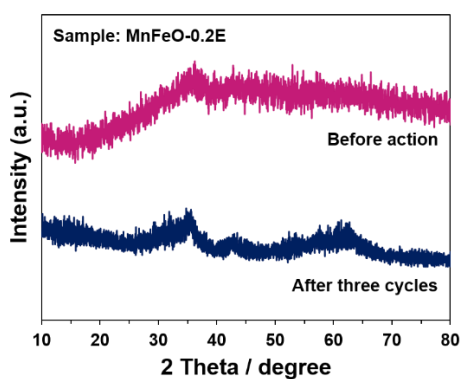

**Fig. S19** XRD spectra of the MnFeO-0.2E sample before and after three-cycle reaction. Reaction conditions: [BPA] = 10 mg/L, [PMS] = 0.2 g/L, [MnFeO-0.2E] = 0.1 g/L .

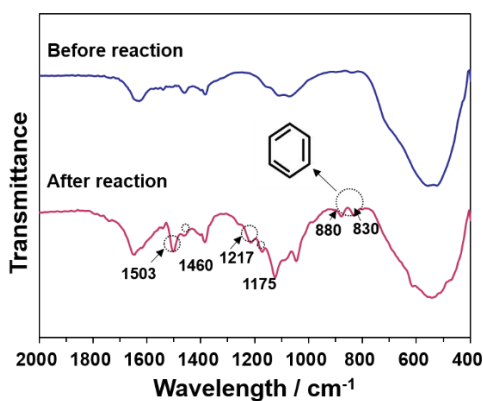

**Fig. S20** FT-IR spectra of the MnFeO-0.2E samples before and after three-cycle reaction with PMS. Reaction conditions: [BPA] = 10 mg/L, [PMS] = 0.2 g/L, [MnFeO-0.2E] = 0.1 g/L .

**Table S1.** Dose of starting materials and code of products obtained in each step of strategy.

| $X_{Fe}$ | Starting material              |                          | Code of products       |                  |              |                   |
|----------|--------------------------------|--------------------------|------------------------|------------------|--------------|-------------------|
|          | $Fe_2(SO_4)_3$<br>( $\mu$ mol) | $MnSO_4$<br>( $\mu$ mol) | MOF@MOF<br>nanocrystal | Annealed MOF@MOF | MOF nanocage | Annealed nanocage |
| 0.05     | 13                             | 479                      | Mn/Fe-0.05             | —                | —            | —                 |
| 0.20     | 48                             | 373                      | Mn/Fe-0.2              | MnFeO-0.2        | Mn/Fe-0.2E   | MnFeO-0.2E        |
| 0.43     | 80                             | 213                      | Mn/Fe-0.43             | MnFeO-0.43       | Mn/Fe-0.43E  | MnFeO-0.43E       |
| 0.54     | 93                             | 160                      | Mn/Fe-0.54             | MnFeO-0.54       | Mn/Fe-0.54E  | MnFeO-0.54E       |

**Table S2.** XPS results of the Fe 2p<sub>3/2</sub> and Mn 2p<sub>3/2</sub> for MnFeO-0.2E sample before and after reaction.

| MnFeO-0.2E      | Fe 2p <sub>3/2</sub> |         | Mn 2p <sub>3/2</sub> |         |        |
|-----------------|----------------------|---------|----------------------|---------|--------|
|                 | Fe(II)               | Fe(III) | Mn(II)               | Mn(III) | Mn(IV) |
| Before reaction | 63                   | 37      | 24                   | 48      | 28     |
| After reaction  | 66                   | 35      | 4                    | 68      | 28     |

**Table S3.** Comparison between MnFeO and the previously reported Mn/Fe oxide catalysts in the catalytic performance.

| Catalyst<br>Dosage<br>(g/L)                                                           | Pollutant<br>(mg/L)    | PMS dosage<br>(g/L) | Conversion<br>(%) | $k$<br>(min <sup>-1</sup> ) | Ref.           |
|---------------------------------------------------------------------------------------|------------------------|---------------------|-------------------|-----------------------------|----------------|
| MnO <sub>2</sub> /ZnFe <sub>2</sub> O <sub>4</sub><br>(0.2)                           | Phenol (20)            | 2.0                 | 100%              | 0.032                       | [1]            |
| $\beta$ -MnO <sub>2</sub> (0.4)                                                       | Phenol (25)            | 2.0                 | 100%              | 0.0723                      | [2]            |
| $\alpha$ -Mn <sub>2</sub> O <sub>3</sub> @ $\alpha$ -<br>MnO <sub>2</sub> -500 (0.15) | Phenol (25)            | ~0.3                | 100%              | 0.05                        | [3]            |
| Corolla-like $\delta$ -<br>MnO <sub>2</sub> (0.2)                                     | Phenol (20)            | 2.0                 | 100%              | 0.19                        | [4]            |
| $\delta$ -FeOOH (0.3)                                                                 | AO7 (50)               | 0.3                 | 91.4%             | 0.099                       | [5]            |
| Fe <sub>3</sub> O <sub>4</sub> @C/Co<br>(0.2)                                         | AO II (20)             | 1.0                 | 99%               | none                        | [6]            |
| Mn <sub>2</sub> O <sub>3</sub> @Mn <sub>5</sub> O <sub>8</sub><br>(0.3)               | 4-chlorophenol<br>(80) | ~0.5                | 100%              | 0.06836                     | [7]            |
| Fe <sub>3</sub> O <sub>4</sub> /MnO <sub>2</sub> (0.2)                                | 4-chlorophenol<br>(50) | 0.5                 | >95%              | ~0.116                      | [8]            |
| Fe <sub>3</sub> O <sub>4</sub> (0.8)                                                  | Acetaminophen<br>(10)  | 0.06                | 98%               | 0.0118                      | [9]            |
| Fe <sub>3</sub> O <sub>4</sub> @MnO <sub>2</sub><br>BBHs (0.3)                        | MB (30)                | 6.0                 | 100%              | 0.0253                      | [10]           |
| DPA-hematite<br>(0.5)                                                                 | BPA (15)               | 2.0                 | 100%              | 0.262                       | [11]           |
| Fe <sub>1.8</sub> Mn <sub>1.2</sub> O <sub>4</sub> (0.1)                              | BPA (10)               | 0.2                 | 100%              | 0.1019                      | [12]           |
| MnFeO-0.2E (0.1)                                                                      | BPA (10)               | 0.2                 | 100%              | 0.2144                      | [This<br>work] |

## References for SI:

- [1] Y. Wang, H. Sun, H. M. Ang, M. O. Tade, S. Wang, *ACS Appl. Mater. Interfaces* **2014**, *6*, 19914.
- [2] E. Saputra, S. Muhammad, H. Sun, H. M. Ang, M. O. Tade, S. Wang, *Environ. Sci. Technol.* **2013**, *47*, 5882.
- [3] A. Khan, H. Wang, Y. Liu, A. Jawad, J. Ifthikar, Z. Liao, T. Wang, Z. Chen, *J. Mater. Chem. A* **2018**, *6*, 1590.
- [4] Y. Wang, H. Sun, H. M. Ang, M. O. Tade, S. Wang, *Appl. Catal., B* **2015**, *164*, 159.
- [5] J. Fan, Z. Zhao, Z. Ding, J. Liu, *RSC Adv.* **2018**, *8*, 7269.
- [6] Z. Xu, J. Lu, Q. Liu, L. Duan, A. Xu, Q. Wang, Y. Li, *RSC Adv.* **2015**, *5*, 76862.
- [7] A. Khan, S. Zou, T. Wang, J. Ifthikar, A. Jawad, Z. Liao, A. Shahzad, A. Ngambia, Z. Chen, *Phys. Chem. Chem. Phys.* **2018**, *20*, 13909.
- [8] J. Liu, Z. Zhao, P. Shao, F. Cui, *Chem. Eng. J.* **2015**, *262*, 854.
- [9] C. Tan, N. Gao, Y. Deng, J. Deng, S. Zhou, J. Li, X. Xin, *J. Hazard. Mater.* **2014**, *276*, 452.
- [10] S. Zhang, Q. Fan, H. Gao, Y. Huang, X. Liu, J. Li, X. Xu, X. Wang, *J. Mater. Chem. A* **2016**, *4*, 1414.
- [11] W.-D. Oh, S.-K. Lua, Z. Dong, T.-T. Lim, *J. Mater. Chem. A* **2014**, *2*, 15836.
- [12] G. X. Huang, C. Y. Wang, C. W. Yang, P. C. Guo, H. Q. Yu, *Environ. Sci. Technol.* **2017**, *51*, 12611.
